# Supplementary material for: Taxonomy of amorphous ternary phase diagrams: the importance of interaction parameters
Source: Royal Society of Chemistry journal article supplement (doi:10.1039/d5cp00335k), 2025-01-01
Supplement: d5cp00335k1.pdf [file d5cp00335k1.pdf]

## Type [110]

$$\begin{aligned}\chi_{12} &> \chi_{12}^c \\ \chi_{13} &< \chi_{13}^c \\ \chi_{23} &< \chi_{23}^c\end{aligned}$$

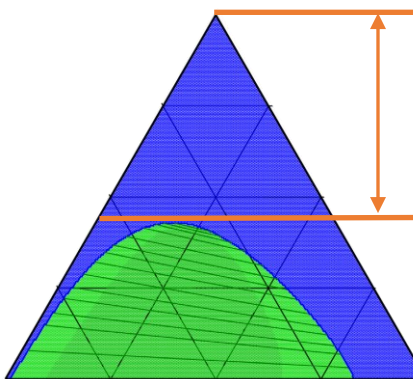

$1 - \max(\varphi_3)$  with  $\varphi_3$  of 2-phase region

$$\begin{aligned}\chi_{12} &< \chi_{12}^c \\ \chi_{13} &> \chi_{13}^c \\ \chi_{23} &< \chi_{23}^c\end{aligned}$$

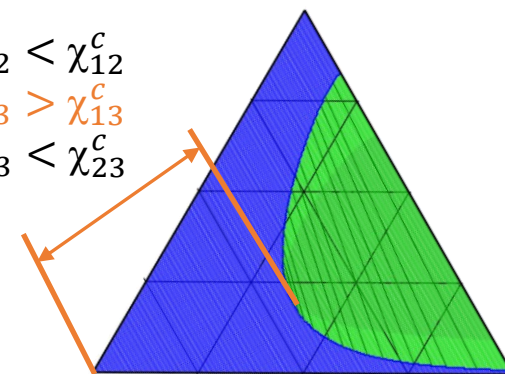

$1 - \max(\varphi_2)$  with  $\varphi_2$  of 2-phase region

$$\begin{aligned}\chi_{12} &< \chi_{12}^c \\ \chi_{13} &< \chi_{13}^c \\ \chi_{23} &> \chi_{23}^c\end{aligned}$$

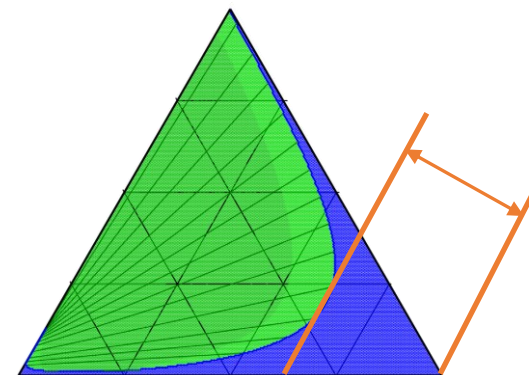

$1 - \max(\varphi_1)$  with  $\varphi_1$  of 2-phase region

## Type [210]

$$\begin{aligned}\chi_{12} &> \chi_{12}^c \\ \chi_{13} &> \chi_{13}^c \\ \chi_{23} &< \chi_{23}^c\end{aligned}$$

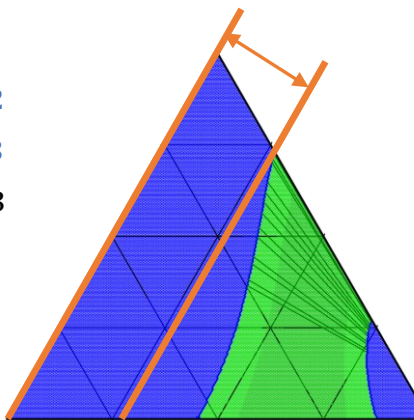

$\text{Min}(\varphi_1)$  with  $\varphi_1$  of 2-phase region

$$\begin{aligned}\chi_{12} &> \chi_{12}^c \\ \chi_{13} &< \chi_{13}^c \\ \chi_{23} &> \chi_{23}^c\end{aligned}$$

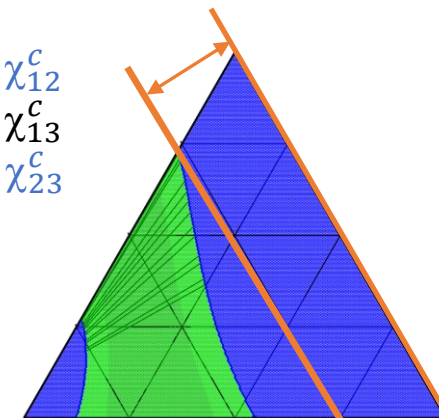

$\text{Min}(\varphi_2)$  with  $\varphi_2$  of 2-phase region

$$\begin{aligned}\chi_{12} &< \chi_{12}^c \\ \chi_{13} &> \chi_{13}^c \\ \chi_{23} &> \chi_{23}^c\end{aligned}$$

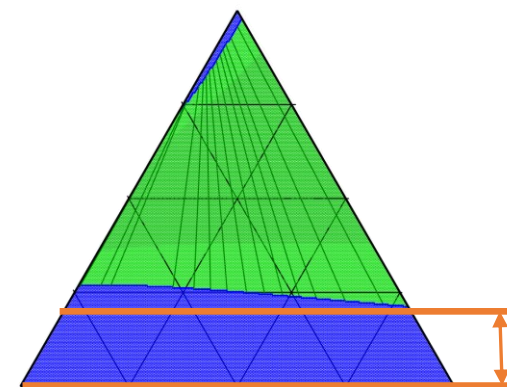

$\text{Min}(\varphi_3)$  with  $\varphi_3$  of 2-phase region
